# Supplementary material for: Genetic Evidence That the Non-Homologous End-Joining Repair Pathway Is Involved in LINE Retrotransposition
Source: PLOS journal article supplement (doi:10.1371/journal.pgen.1000461), 2009-04-23

A

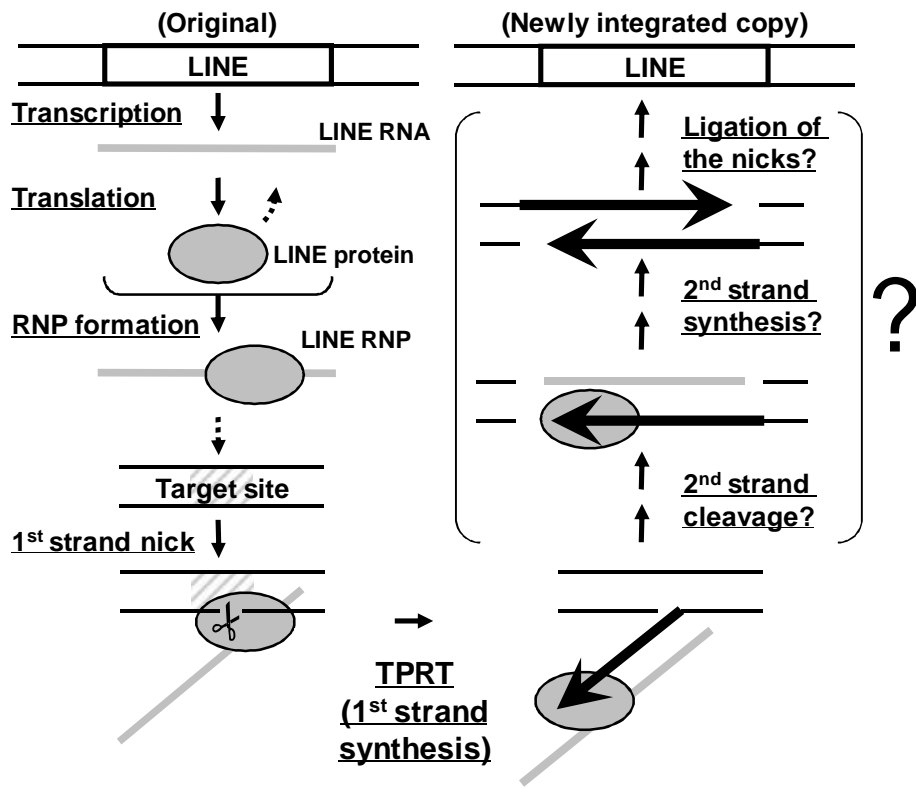

B

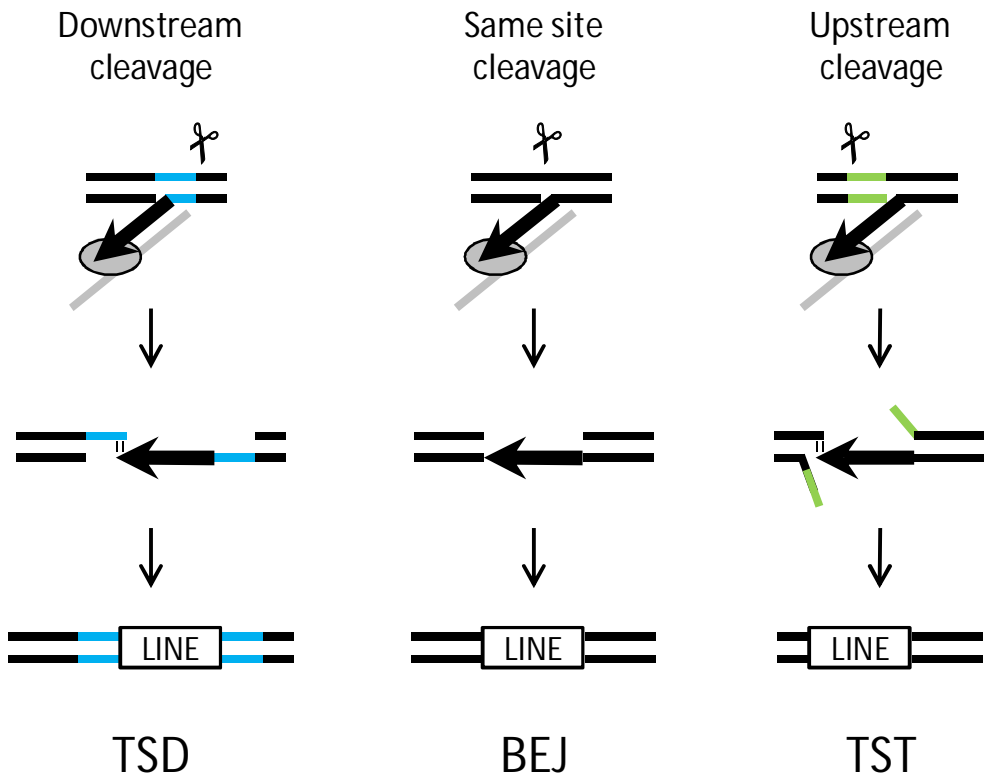

Supplement: S1 (10.1371/journal.pgen.1000461.s001) [file journal.pgen.1000461.s001]
