# Supplementary material for: Genetic Evidence That the Non-Homologous End-Joining Repair Pathway Is Involved in LINE Retrotransposition
Source: PLOS journal article supplement (doi:10.1371/journal.pgen.1000461), 2009-04-23
Supplement: S4 (10.1371/journal.pgen.1000461.s004) [file journal.pgen.1000461.s004]

**A**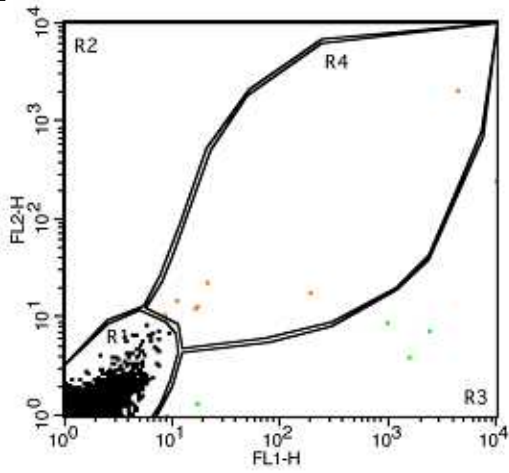**B**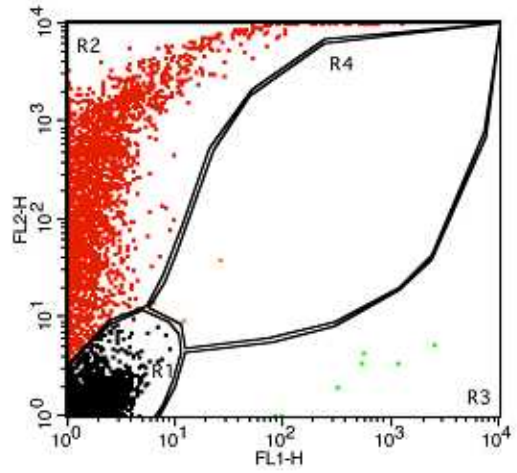**C**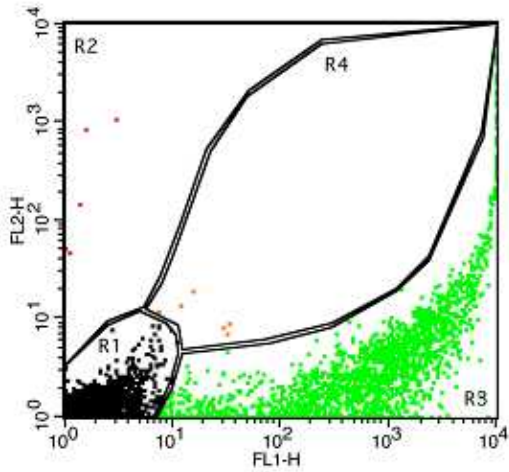**D**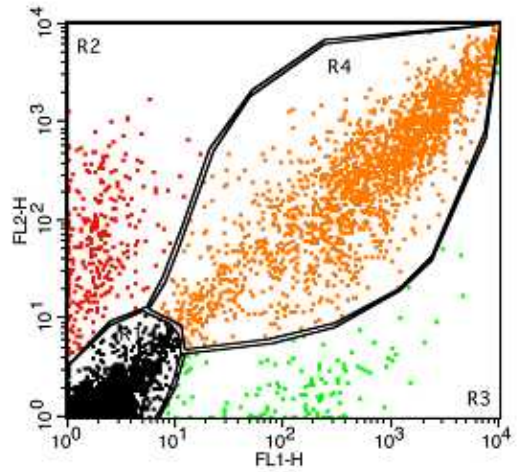**E**

| Region               | Electroporated DNA |        |        |              |
|----------------------|--------------------|--------|--------|--------------|
|                      | No DNA             | DsRed  | EGFP   | DsRed & EGFP |
| R1 (No fluorescence) | 99.85%             | 68.44% | 75.22% | 70.21%       |
| R2 (Red)             | 0.00%              | 31.39% | 0.06%  | 3.73%        |
| R3 (Green)           | 0.07%              | 0.08%  | 24.48% | 1.78%        |
| R4 (Red & Green)     | 0.08%              | 0.03%  | 0.10%  | 23.94%       |
