# Supplementary material for: Genetic Evidence That the Non-Homologous End-Joining Repair Pathway Is Involved in LINE Retrotransposition
Source: PLoS Genet. 2009 Apr 24;5(4):e1000461. doi: 10.1371/journal.pgen.1000461 (PMC2666801; doi:10.1371/journal.pgen.1000461)
Supplement: Table S2 — L1 retrotransposition in DT40 cells. (0.05 MB DOC) [file pgen.1000461.s017.doc]

Table S2: L1 retrotransposition in DT40 cells

| DT40 cell line | L1 status | na | Transfection efficiencyb (%) | Geometric mean of EGFP FIc | Median of EGFP FId | Number of G418R colonies per dishe | Plating efficiencyf (%) | Retrotransposition frequency ( 10-3)  (Mean ± SD) | Percent of WTg |
| --- | --- | --- | --- | --- | --- | --- | --- | --- | --- |
| Wild type | WT | 14 | 7 ± 5 | 602 ± 217 | 819 ± 434 | 258 ± 145 | 46 ± 12 | 12.0 ± 3.3 | 100% |
| EN– | 2 | 3 ± 1 | 425 ± 5 | 434 ± 36 | 0 | 49 ± 21 | < 0.2 | - |
| Ku70–/– | WT | 8 | 4 ± 2 | 328 ± 90 | 348 ± 126 | 16 ± 12 | 15 ± 12 | 5.3 ± 2.4 | 44% |
| EN– | 2 | 3 ± 2 | 321 ± 33 | 365 ± 76 | 0 | 8 ± 3 | < 1.1 | - |
| Artemis–/– | WT | 11 | 7 ± 4 | 840 ± 295 | 1022 ± 452 | 63 ± 55 | 19 ± 10 | 5.9 ± 2.6 | 49% |
| EN– | 2 | 5 ± 2 | 498 ± 63 | 482 ± 75 | 0 | 14 ± 3 | < 0.3 | - |
| LigIV–/– | WT | 11 | 2 ± 1 | 387 ± 103 | 440 ± 159 | 28 ± 12 | 31 ± 19 | 8.0 ± 2.9 | 67% |
| EN– | 2 | 2 ± 1 | 344 ± 28 | 322 ± 30 | 0 | 26 ± 5 | < 0.6 | - |
| Rad18–/– | WT | 6 | 10 ± 5 | 672 ± 161 | 948 ± 289 | 358 ± 134 | 42 ± 20 | 16.6 ± 5.1 | 139% |
| EN– | 2 | 6 ± 1 | 415 ± 125 | 423 ± 134 | 0 | 28 ± 10 | < 0.2 | - |
| SHIP1–/– | WT | 7 | 6 ± 3 | 573 ± 209 | 818 ±354 | 91 ± 36 | 21 ± 5 | 12.1 ± 5.2 | 101% |
| EN– | 2 | 3 ± 1 | 394 ± 5 | 482 ± 18 | 0 | 45 ± 7 | < 0.3 | - |

an indicates the number of independent experiments. bThe transfection efficiency was calculated as the percentage of the EGFP-positive cells 3 days after electroporation. cMean ± standard deviation (SD) of the geometric mean of the EGFP fluorescence intensity (FI) 3 days after electroporation. dMean ± SD of the median of the EGFP FI 3 days after electroporation. eMean ± SD of G418-resistant colonies per dish in which ~1  106 electroporated DT40 cells were plated (see Materials and Methods). fPlating efficiency was calculated as the percentage of the number of colonies formed in soft agarose medium containing no antibiotic relative to the 200 DT40 cells plated (see Materials and Methods). Mean ± SD of the plating efficiency is shown. gThe percentage of L1 retrotransposition was determined with respect to the retrotransposition frequency of wild-type L1 in wild-type DT40. WT, wild type. EN–, endonuclease mutant.
